# Supplementary material
Source: PubMed Central journal article supplement (PMC5935140)
Supplement: NIHMS957145-supplement-1.pdf [file NIHMS957145-supplement-1.pdf]

# SUPPLEMENTARY FIGURES

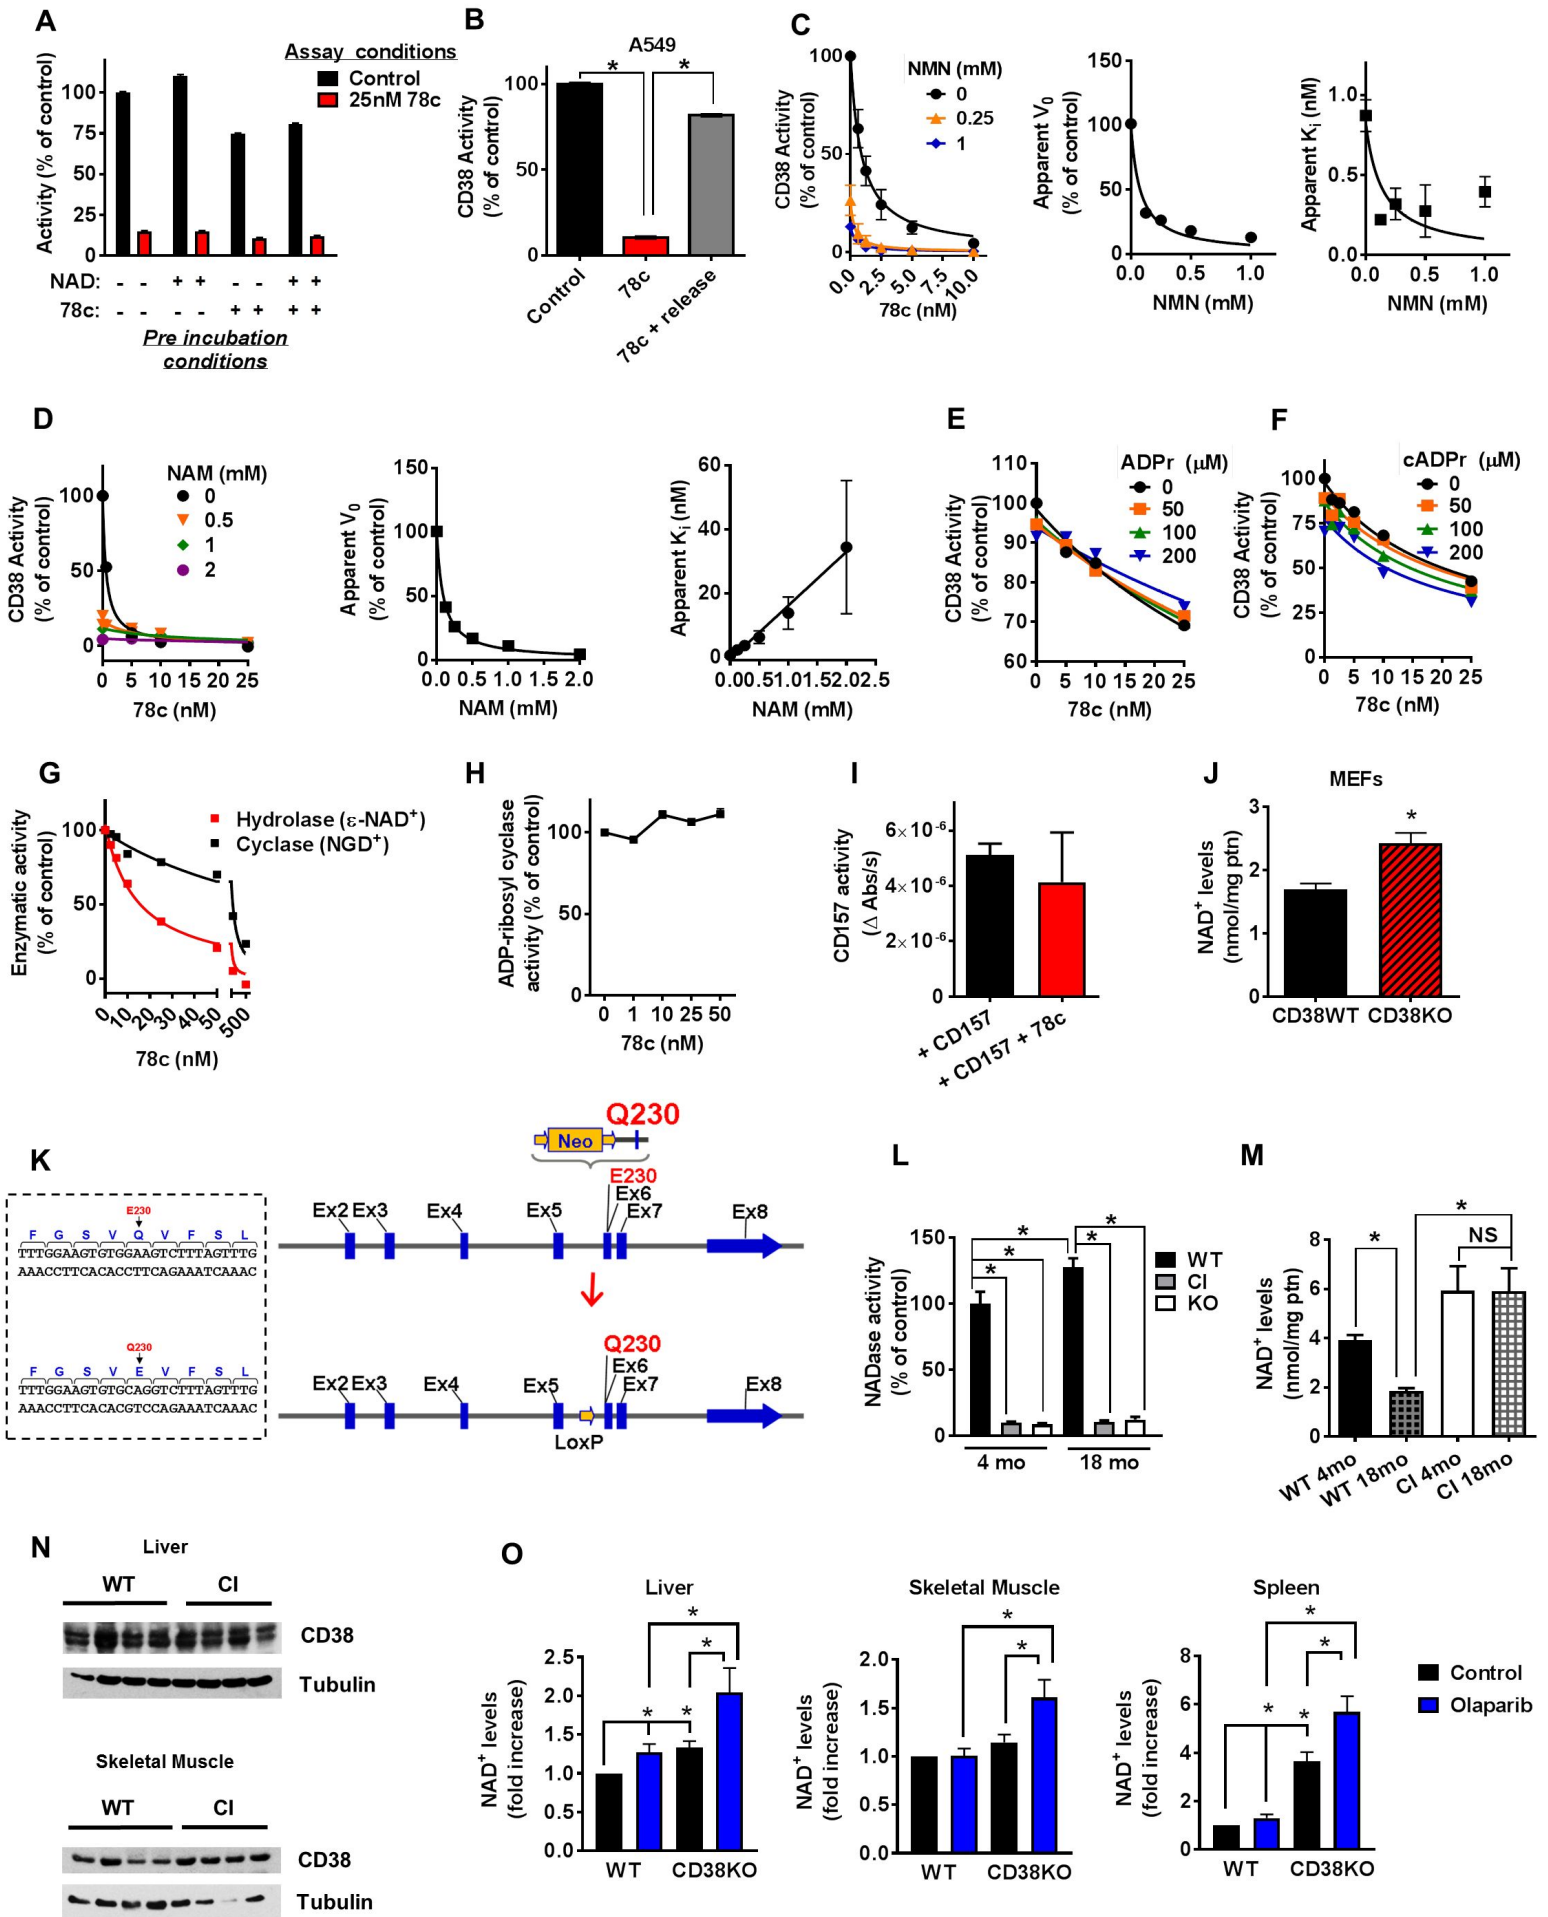

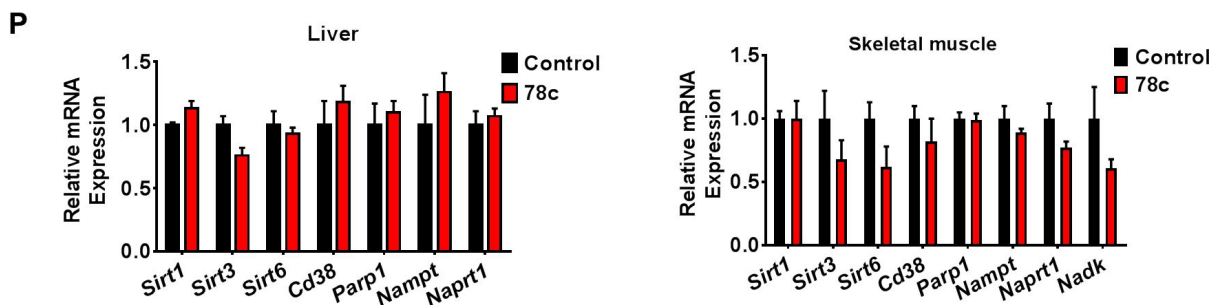

**Figure S1 (Related to Figure 1). Characterization of the effect of 78c on CD38 and other NAD<sup>+</sup>-related enzymes. (A)** Reversibility of the effect of 78c was tested using human recombinant CD38 enzyme (rhCD38). Following pre-incubation under the conditions showed in the graph, samples were diluted 100-fold in sucrose buffer alone (Control) or with 25 nM 78c. CD38 activity was measured using 1,N6-ethenoadenine dinucleotide ( $\epsilon$ -NAD<sup>+</sup>) as a substrate. Data are expressed as percent activity relative to control (n= 3 experiments). **(B)** A549 cells were treated with vehicle or 0.5  $\mu$ M 78c, then washed and incubated with (78c) or without (78c+release) 0.5  $\mu$ M 78c. Control cells were exposed to vehicle for the whole treatment period. CD38 activity was measured in cell lysates (n=3 experiments). **(C-F)** Effect of **(C)** nicotinamide mononucleotide (NMN), **(D)** nicotinamide (NAM), **(E)** ADP-ribose (ADPr), and **(F)** cyclic ADP-ribose (cADPr) on the kinetics of inhibition of rhCD38 by 78c ( $\epsilon$ -NAD as a substrate, n=3 experiments for each). **(G)** Comparison of effect of 78c on rhCD38 hydrolytic activity ( $\epsilon$ -NAD as a substrate) and cyclase activity (nicotinamide guanine dinucleotide (NGD<sup>+</sup>) as a substrate, n=3 experiments). **(H)** Effect of 78c on the ADP-ribosyl cyclase activity of purified cyclase from *Aplysia* ovotestis extracts. **(I)** Effect of 78c on CD157 activity (nicotinamide riboside (NR) as substrate, n=3 experiments). **(J)** NAD<sup>+</sup> levels in WT and CD38 KO MEFs (n=11 experiments). **(K)** Schematic of CD38 knock-in construct showing the point mutation introduced in exon 6 of CD38 gene. **(L)** CD38 (NADase) activity in liver of young and old WT, CD38 CI (catalytically inactive), and CD38 KO mice (n=4 mice per group). **(M)** Liver NAD<sup>+</sup> levels in young and old WT and CI mice (n=4 mice per group). **(N)** Liver and skeletal muscle protein lysates of WT and CI mice were immunoblotted for CD38 and Tubulin (n=4 mice per group). **(O)** NAD<sup>+</sup> levels in tissues of WT and CD38 KO mice treated with the PARP inhibitor olaparib for 8 days (n=5-9 mice per group). **(P)** mRNA levels of NAD<sup>+</sup> metabolism-related genes in liver and skeletal muscle of vehicle and 78c-treated aged mice, determined by quantitative RT-PCR (n=12-15 mice per group). All values are mean  $\pm$  SEM. \* $P$ <0.05, NS=not significant.

### 3-month-old mice

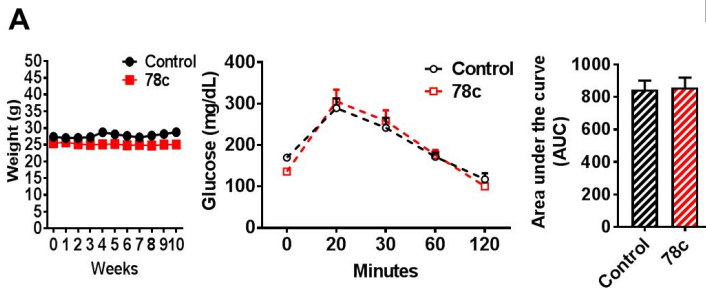

### 1-year-old mice

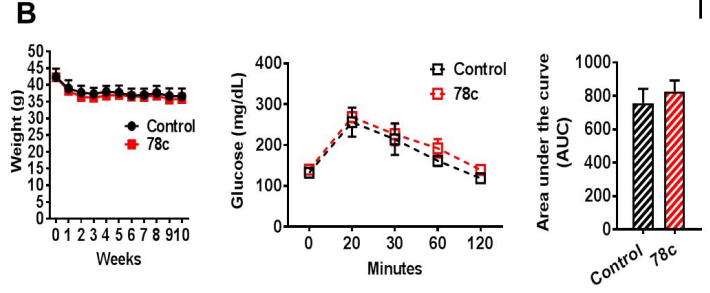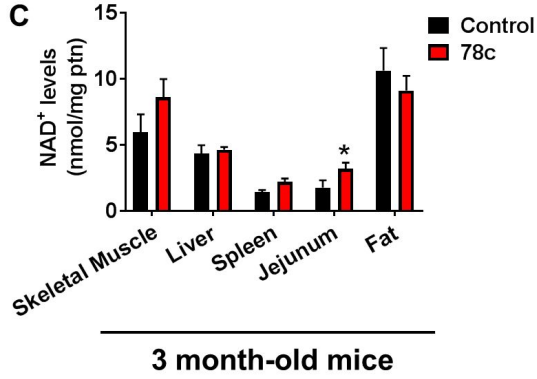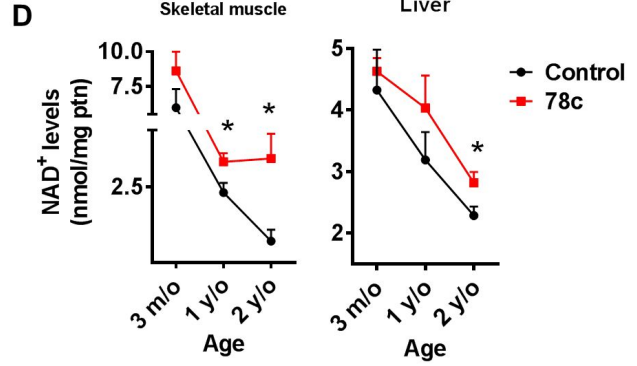

### 2-year-old mice

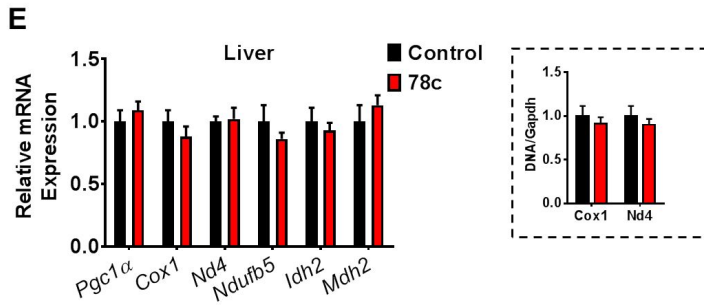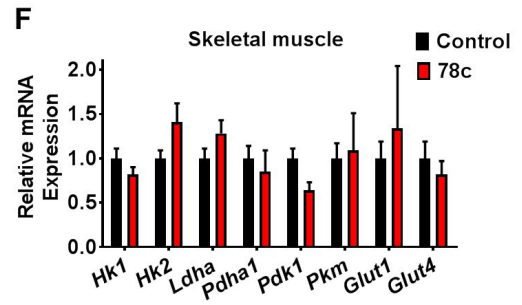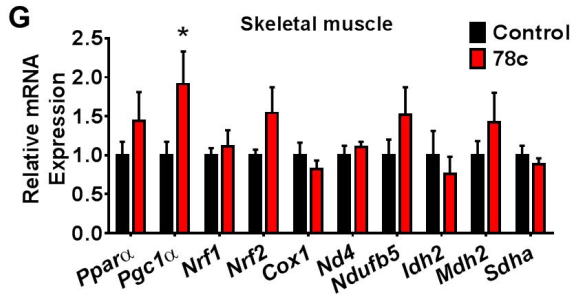

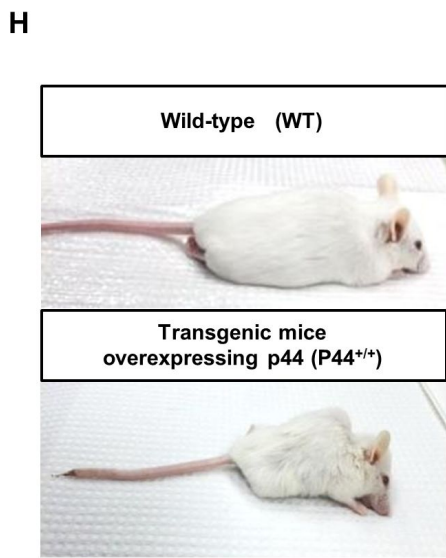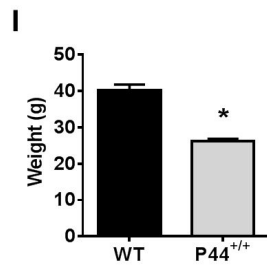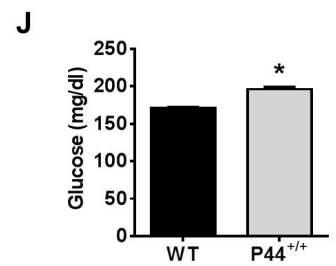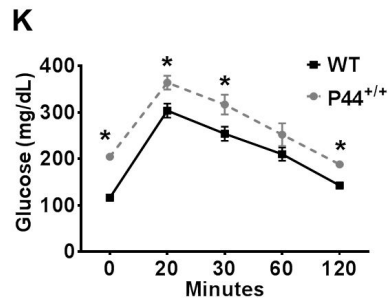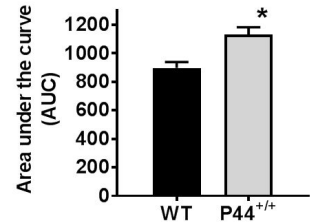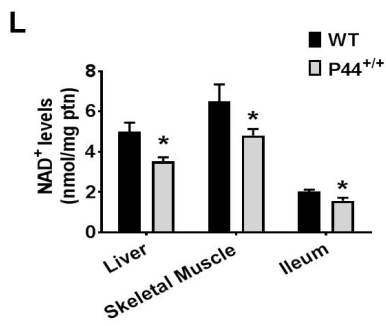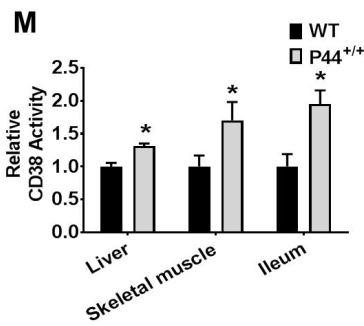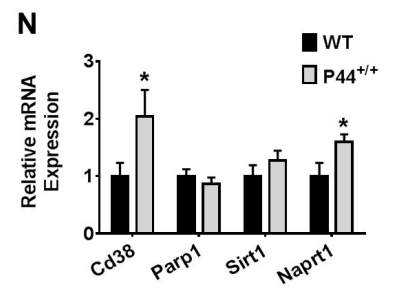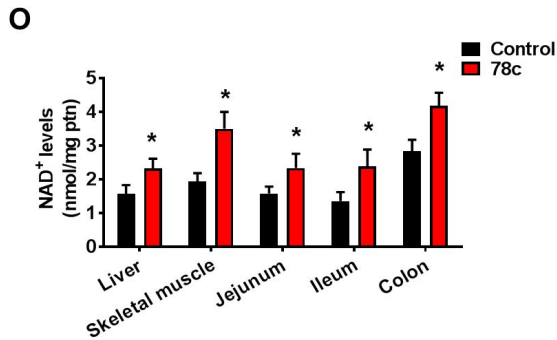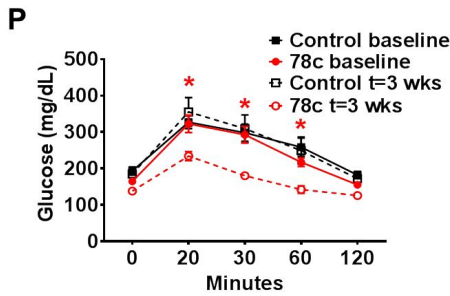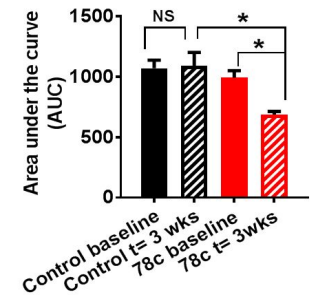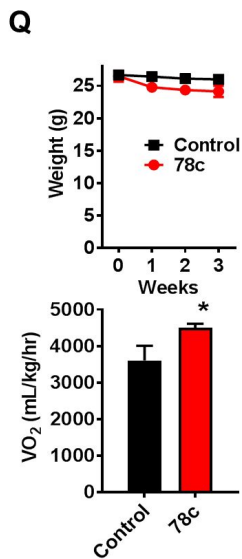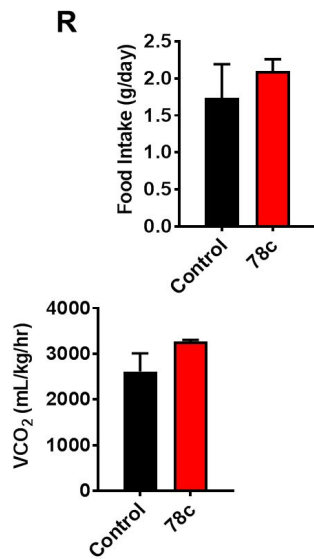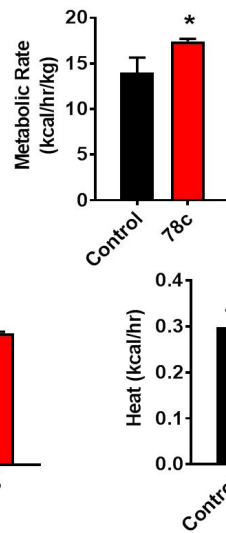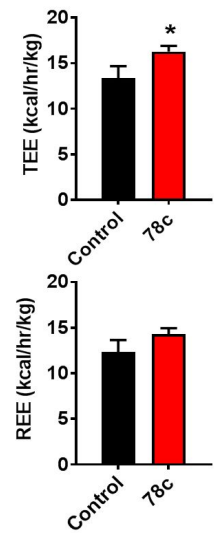

**Figure S2 (Related to Figure 2). Metabolic features of 3-month-old (young), 1-year-old (middle-aged), and 2-year-old (aged) mice treated with 78c, and characterization of NAD<sup>+</sup> metabolism in an animal model of progeria. (A-B)** 3-month-old and 1-year-old mice were treated with vehicle (Control) or 78c. **(A)** Left panel shows weekly body weight measurements of 3-month-old mice (n= 8 mice per group) and right panel shows intraperitoneal glucose tolerance test (ipGTT) and corresponding area under the curve (AUC) after 7 weeks of treatment (n=8 mice per group). **(B)** Left panel shows weekly body weights measurements of 1-year-old mice (n=8-11 mice per group) and right panel shows ipGTT and corresponding AUC after 7 weeks of treatment (n=8-11 mice per group). **(C)** NAD<sup>+</sup> levels in multiple tissues of 3-month-old mice at the end of 14 weeks of treatment (n=8 mice per group). **(D)** NAD<sup>+</sup> levels in skeletal muscle and liver of 3-month-old, 1-year-old, and aged (2-year-old) mice treated with vehicle (Control) or 78c for up to 14 weeks. **(E-G)** Aged (2-year-old) mice treated with vehicle (Control) or 78c for up to 14 weeks. **(E)** Expression of mitochondrial biogenesis genes in liver, determined by quantitative RT-PCR (n=6-13 mice per group). Inset shows relative mtDNA content for liver, with *Cox1* and *Nd4* as mitochondrial-encoded genes normalized to *Gapdh* (n=6 mice per group). **(F-G)** Skeletal muscle mRNA levels of genes related to glucose metabolism **(F)** and mitochondrial biogenesis **(G)**, determined by quantitative RT-PCR (n=6 mice per group). Inset in G shows relative mtDNA content for skeletal muscle, with Cox I and Nd4 as mitochondrial-encoded genes normalized to *Gapdh* (n=6 mice per group). **(H-N)** 1-year-old WT and P44<sup>+/+</sup> progeroid mice. **(H)** Representative images of WT and P44<sup>+/+</sup> mice. **(I)** Body weight (n=13 mice per group). **(J)** Random fed serum glucose (n=13 mice per group). **(K)** ipGTT and corresponding AUC (n=10 mice per group). **(L)** NAD<sup>+</sup> levels in several tissues (n=12 mice per group). **(M)** CD38 activity in tissues (n=10 mice per group). **(N)** Liver mRNA levels of NAD<sup>+</sup> metabolism-related enzymes determined by quantitative RT-PCR (n=6 mice per group). **(O-R)** 1-year-old P44<sup>+/+</sup> mice treated with vehicle (Control) or 78c. Results show average of two independent experiments. **(O)** NAD<sup>+</sup> levels in several tissues at the end of 4 weeks of treatment (n=13 mice per group). **(P)** ipGTT and corresponding AUC at baseline and after 3 weeks of treatment (n=9-11 mice per group). Two-way repeated measures ANOVA with Bonferroni's post-tests shows significant interaction between the glucose curve for control and 78c-treated mice. **(Q)** Weekly body weight measurements (n=13 mice per group). **(R)** Comprehensive Laboratory Animal Monitoring System (CLAMS) measurements of food intake, metabolic rate, total energy expenditure (TEE), oxygen consumption (VO<sub>2</sub>), carbon dioxide production (VCO<sub>2</sub>), respiratory coefficient (RQ), heat production, and resting energy expenditure (REE) (n= 4 mice per group). All values are mean ± SEM, \* *P* < 0.05. NS=not significant.

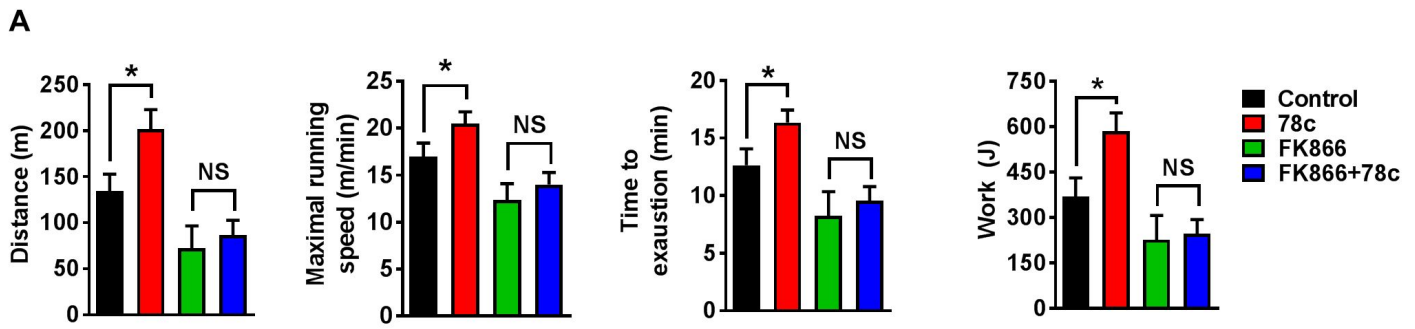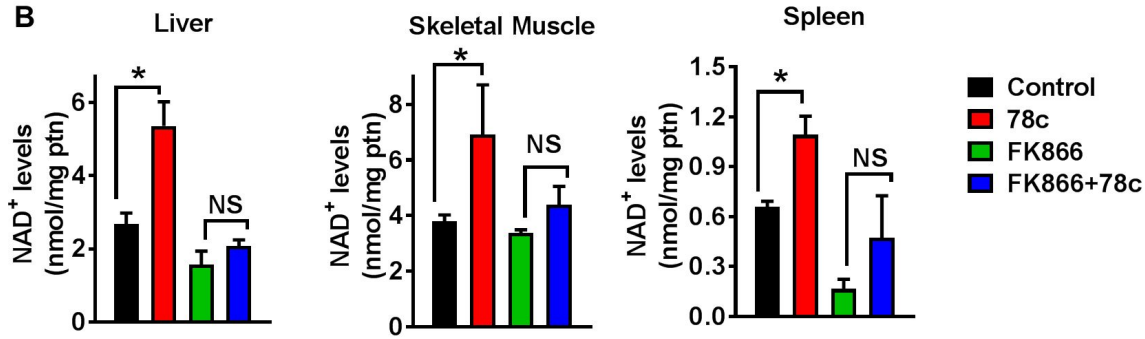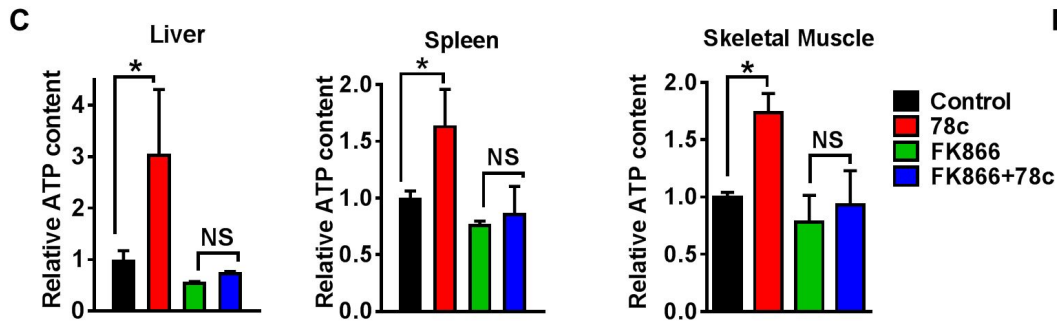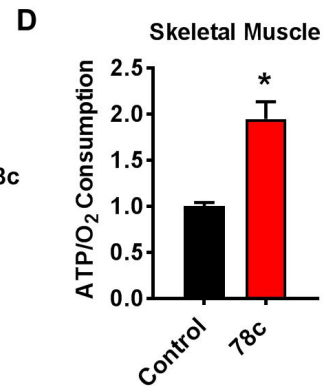

3-month-old mice

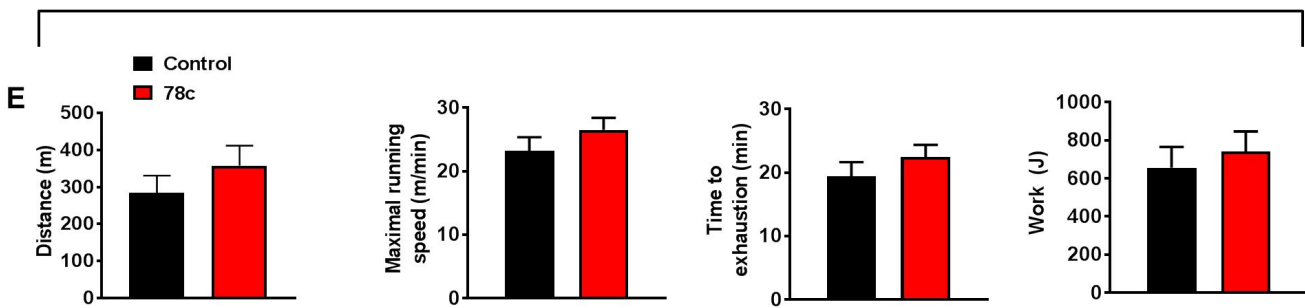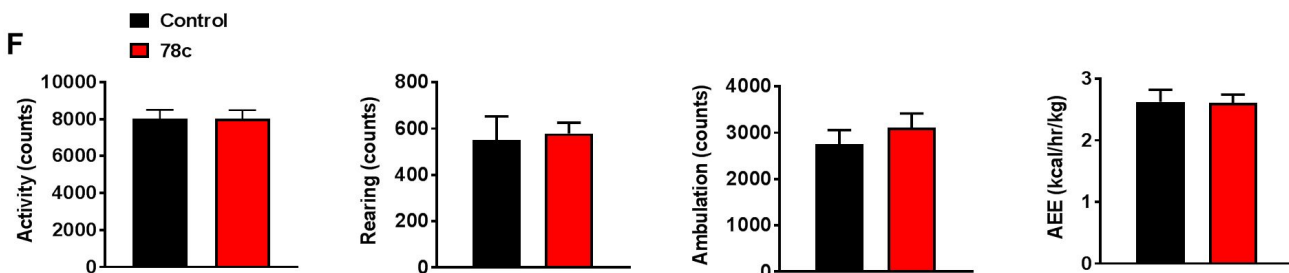

**G**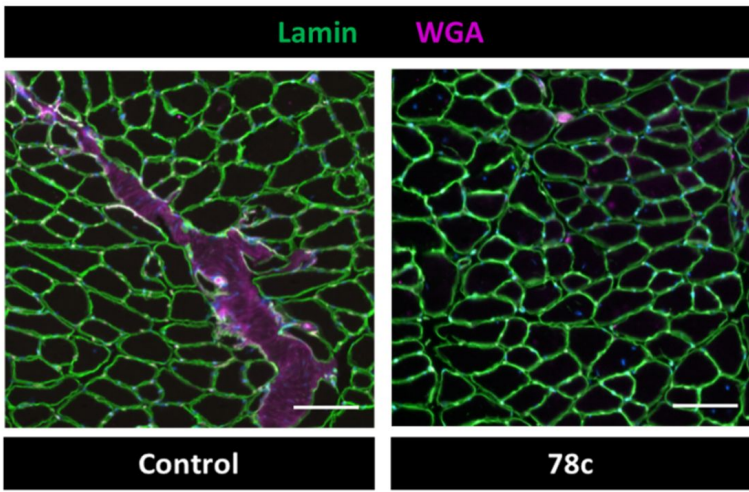**H**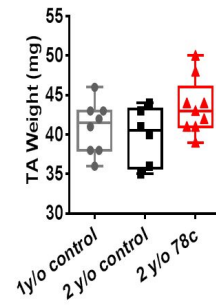**I**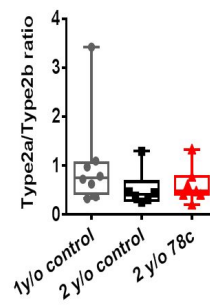**J**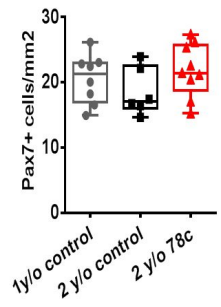**K**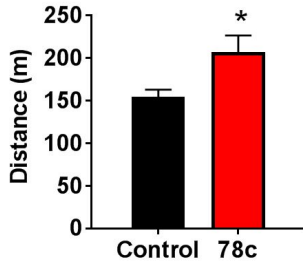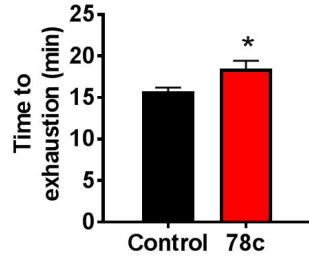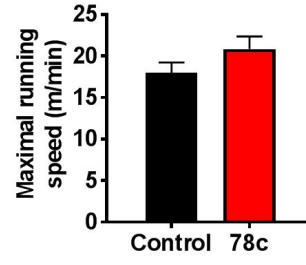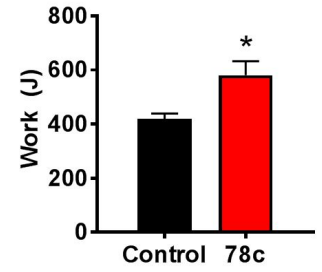**L**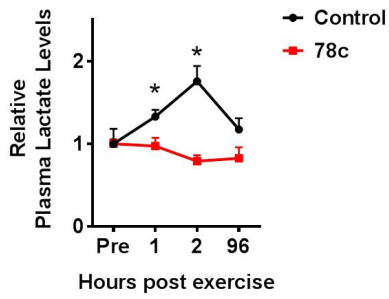**M**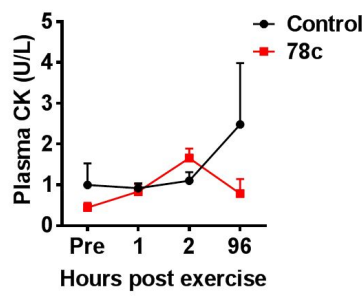



N

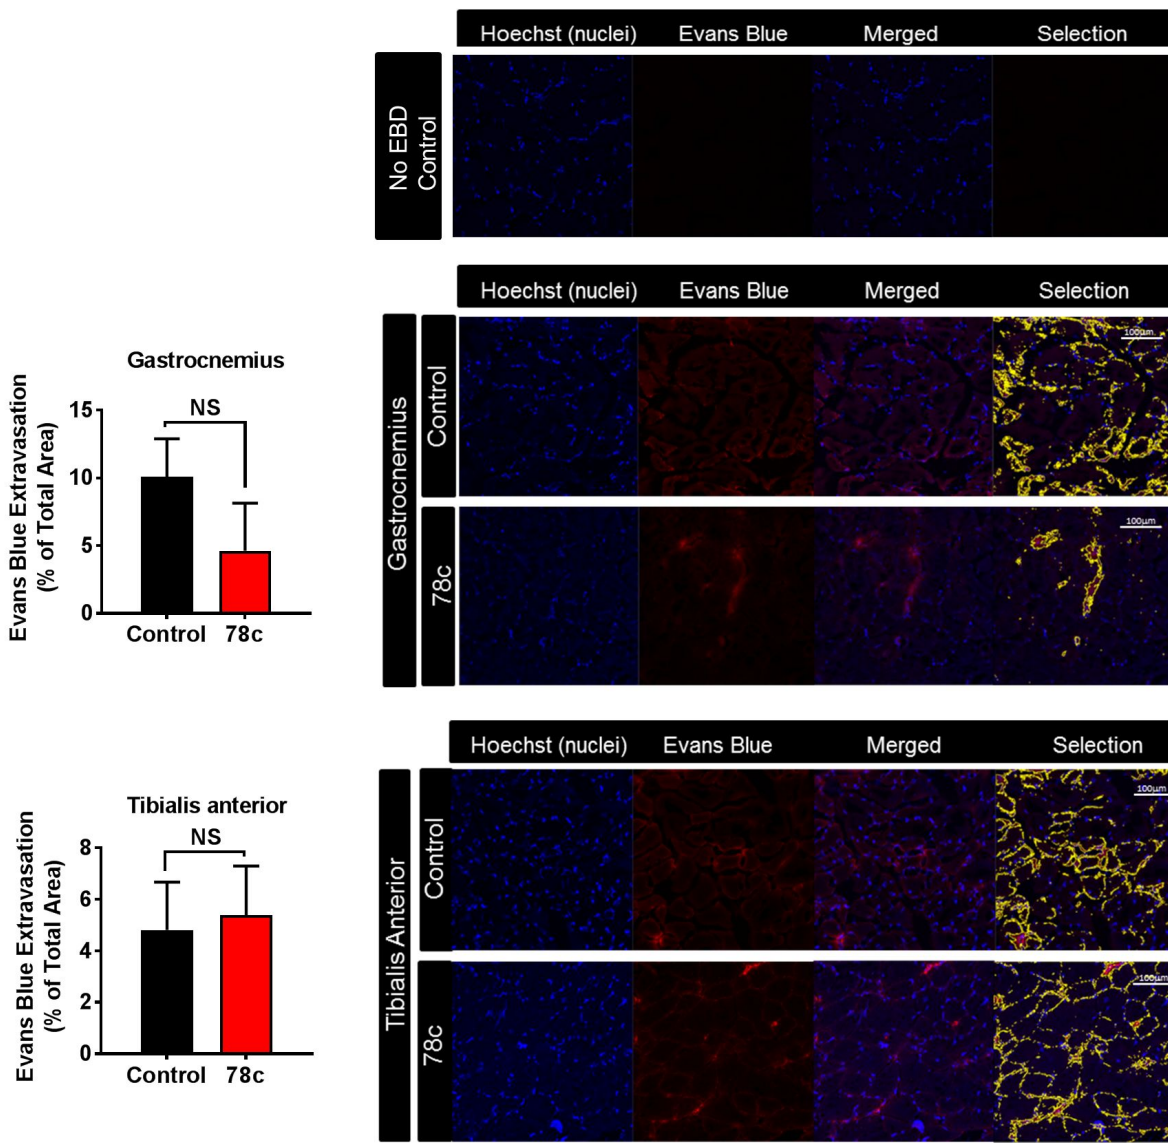

O

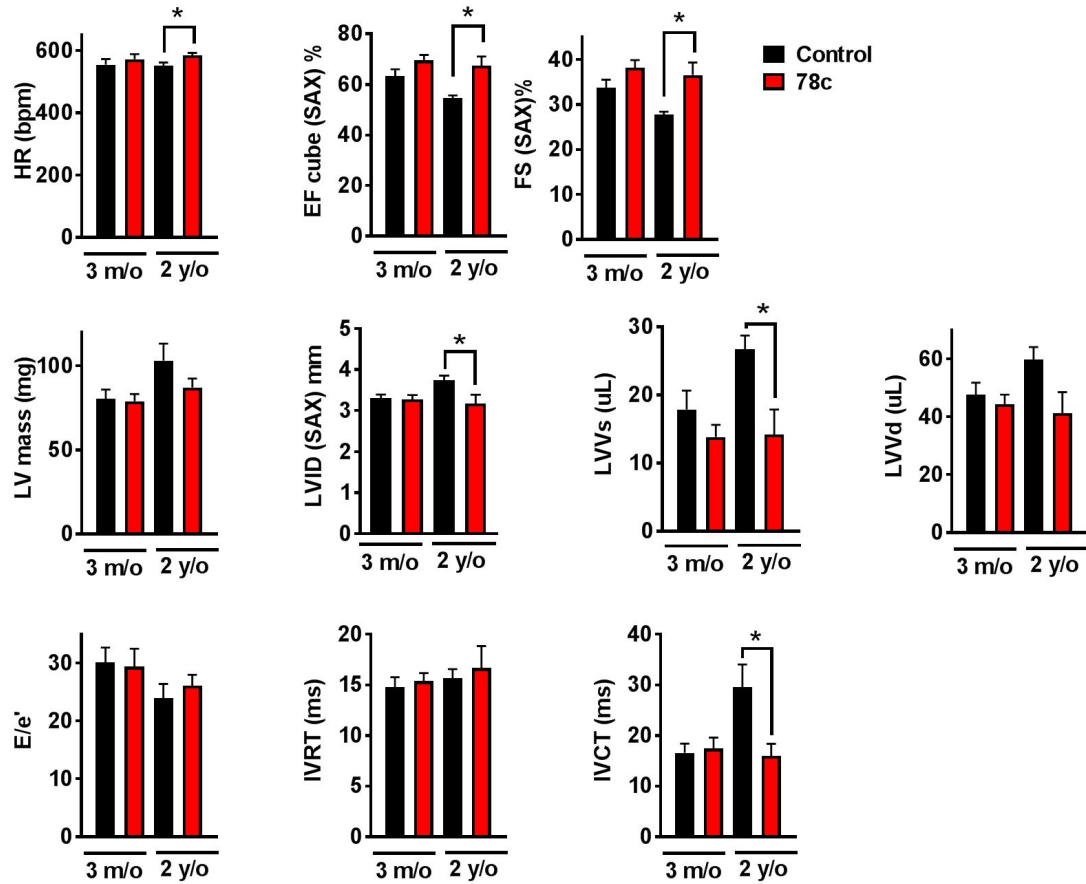

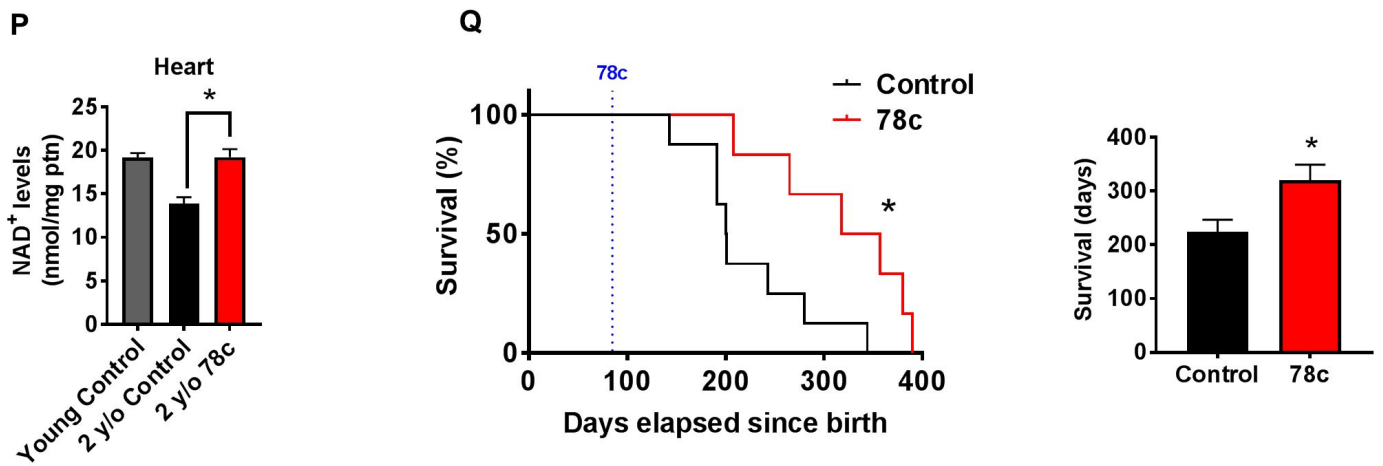

**Figure S3 (Related to Figure 3). Skeletal muscle features in mice treated with 78c. (A-C)** 2-year-old (aged) mice treated with vehicle (Control), 78c, FK866 (NAMPT inhibitor), or 78c+FK866. **(A)** Physical performance assessment on a motorized treadmill after 8 weeks of treatment: measurements of distance, maximal running speed, running time, and work (n=5 mice per group). **(B)** Tissue NAD<sup>+</sup> levels at end of 10 weeks of treatment (n=5 mice per group). **(C)** Tissue ATP levels at end of study, measured by a luminescence assay. **(D)** Ratio of skeletal muscle ATP level and O<sub>2</sub> consumption in isolated muscle fibers from 2-year-old mice treated with vehicle (Control) or 78c for 10 weeks (n= 4-5 mice per group). **(E-F)** 3-month-old mice treated with vehicle (Control) or 78c (n=8 mice per group). **(E)** Physical performance assessment on treadmill after 8 weeks of treatment: measurements of distance, maximal running speed, running time, and work. **(F)** Measurements of locomotor activity by CLAMS after 4 weeks of treatment: total activity, rearing counts, ambulation, AEE. **(G)** Representative images of wheat germ agglutinin (WGA) (magenta) and lamin (green) co-staining of skeletal muscle sections from aged mice treated with vehicle (Control) or 78c for 14 weeks. **(H-J)** 1-year-old mice and 2-year-old (aged) mice treated with vehicle (Control) or 78c for up to 14 weeks. **(H)** Weight of tibialis anterior muscle (TA) (n=6-9 mice per group). **(I)** Fiber-type switching in TA muscle (n=6-9 mice per group). **(J)** Number of PAX7<sup>+</sup> cells per unit of muscle area (n=6-9 mice per group). **(K-M)** 2-year-old (aged) mice were treated with vehicle (Control) or 78c. **(K)** Physical performance assessment during downhill treadmill exercise on a motorized treadmill (10° decline) after 10 weeks of treatment. Measurements of distance, maximal running speed, running time, and work (n= 5-6 mice per group). **(L)** Relative plasma lactate levels before and after downhill running exercise (n=5-6 mice per group). **(M)** Plasma creatine kinase (CK) levels before and after downhill running exercise (n=5-6 mice per group). **(N)** Evans blue dye (EBD) assessment of sarcolemmal integrity within the gastrocnemius (GA) and TA muscles of mice submitted to a downhill treadmill exhaustion protocol. Images are representative of GA and TA muscles from EBD-injected control/78c treated mice showing Hoechst (nuclei) and EBD 96 hours post injury. The yellow selection surrounds the EBD<sup>+</sup> fibers. The graphs show percentage of total area with Evans Blue extravasation. Scale bar: 100 μm. **(O)** Transthoracic echocardiography measurements in 3-month-old and aged (2-year-old) mice treated with vehicle (Control) or 78c (n=5-8 animals per group). Parameters assessed after 9 weeks of treatment were: HR- Heart Rate; EF- Ejection fraction, FS- Fractional shortening, LV mass- Left ventricular mass, LVID- Left ventricular internal dimension, LVVs- Left ventricle volume during systole, LVVd- Left ventricle volume during diastole, E/e'- Early filling (E) and early diastolic mitral annular velocity (e') ratio, IVRT- Isovolumic (or isovolumetric) relaxation time, IVCT- Isovolumic (isovolumetric) contraction time. SAX: short axis. **(P)** NAD<sup>+</sup> levels in heart of young and aged mice treated with vehicle (Control) or 78c for 10 weeks (n=4 mice per group). **(Q)** Kaplan-Meier overall survival curve of Bub1<sup>H/H</sup> mice treated with vehicle (Control) and 78c for up to 10 months. Asterisk denotes significance compared to control mice using a log-rank (Mantel-Cox) test and the Gehan-Breslow-Wilcoxon test. Tick line indicates start of 78c/control treatment. Right panel shows overall survival of both groups (n=6-8 mice per group). All values are mean ± SEM. \* P < 0.05.

**A**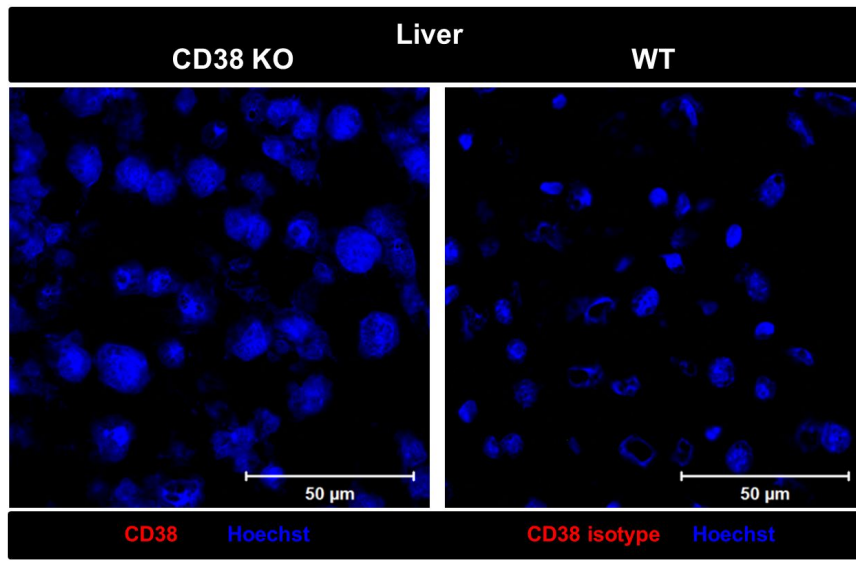**B**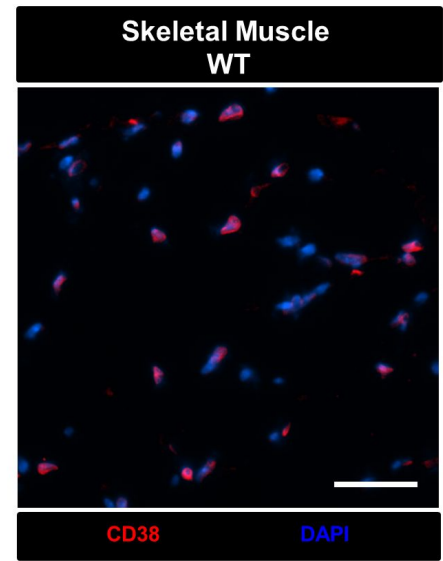**C**

Live singlets: CD38 vs. CD45      Live singlets: CD38 vs. CD31

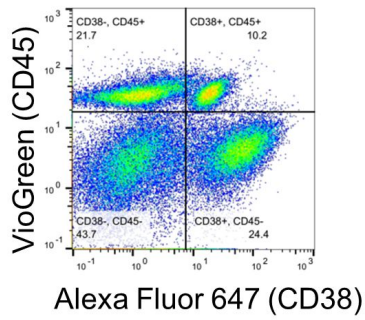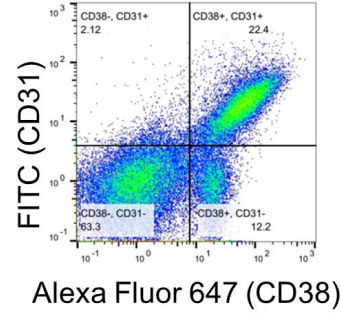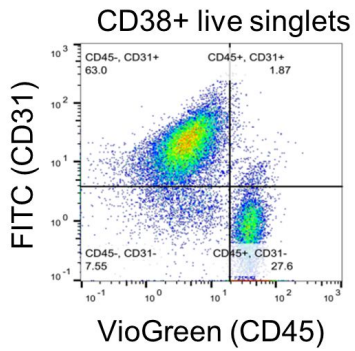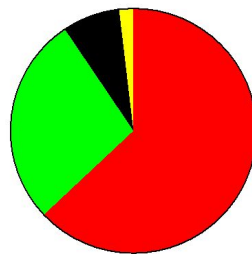

- 63.00 CD45- CD31+
- 27.60 CD45+ CD31-
- 7.55 CD45- CD31-
- 1.87 CD45+ CD31+

**D**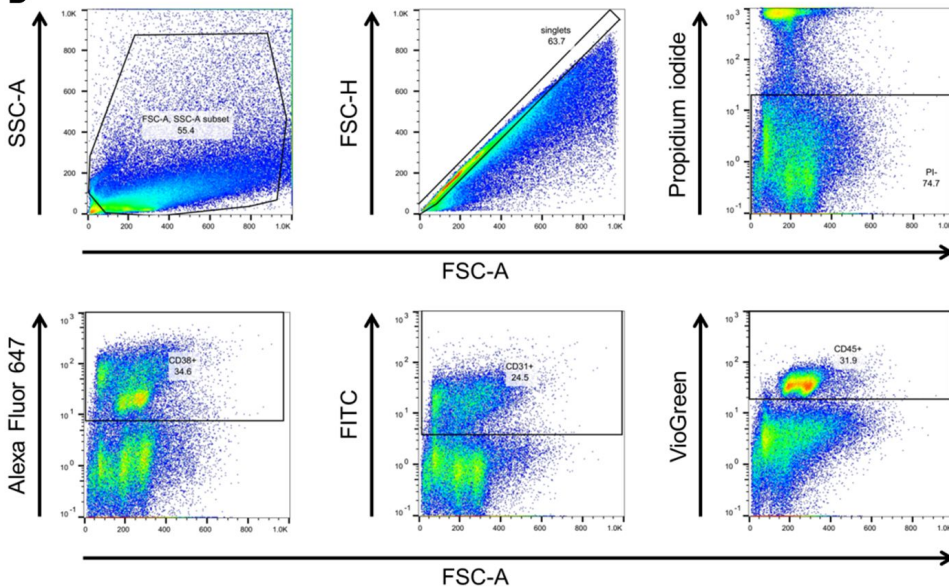

**E****Skeletal Muscle: CD38+ live singlets**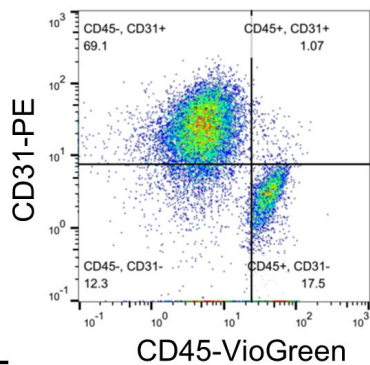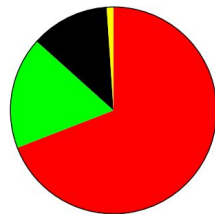

■ CD45- CD31+  
■ CD45+ CD31-  
■ CD45- CD31-  
■ CD45+ CD31+

**Skeletal Muscle: CD38+, CD45-, CD31-**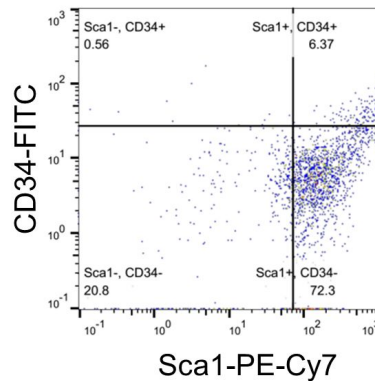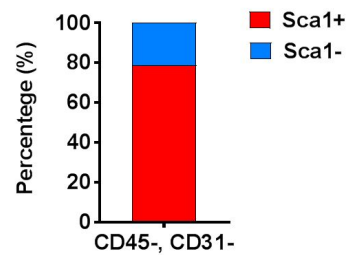**F****Heart: CD38+ live singlets**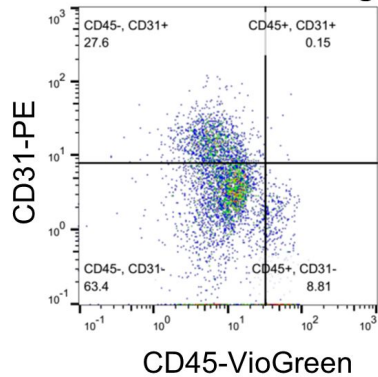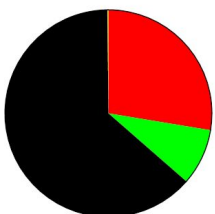

■ CD45- CD31+  
■ CD45+ CD31-  
■ CD45- CD31-  
■ CD45+ CD31+

**Heart: CD38+, CD45-, CD31-**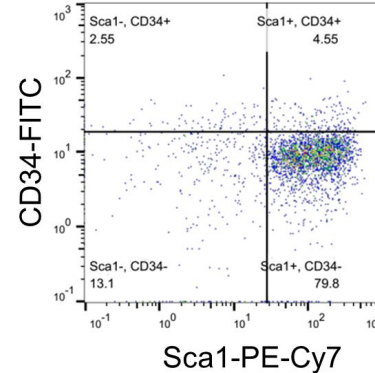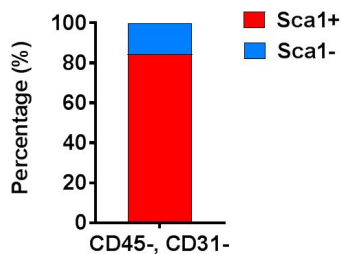**G**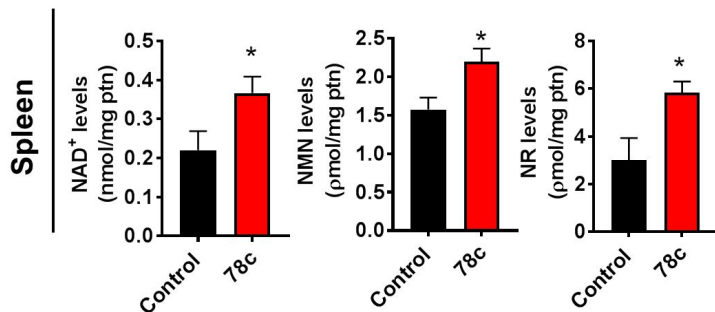**H**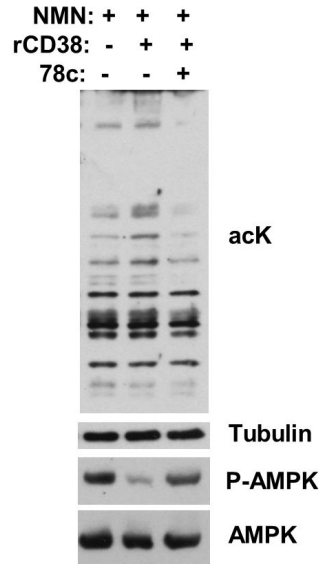**I**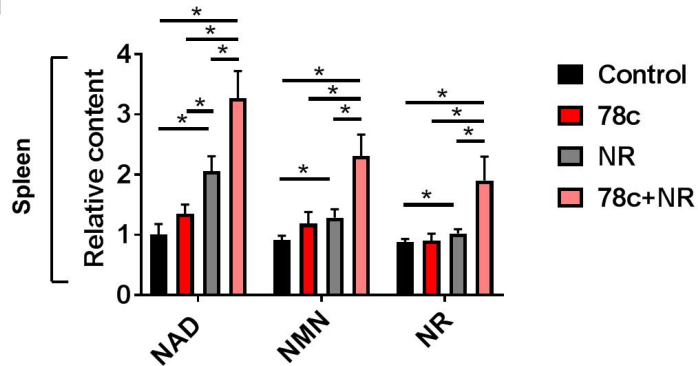

**Figure S4 (Related to Figure 4). Cellular localization of CD38 in multiple tissues and modulation of NAD<sup>+</sup> and its precursors by 78c.** (A) Immunofluorescence analysis of liver sections from CD38KO and WT mice co-stained for CD38 or CD38 isotype (red). Hoerchst-stained nuclei are shown in blue. Scale bar represents 50  $\mu$ m. (B-D) Representative figures of staining and gating strategy for live singlet cells present in skeletal muscle samples of WT mice. (B) Representative image of skeletal muscle tissue section of WT mice immunostained for CD38. (C) Representative fluorescent signal plots of CD38, CD45 and CD31 expressing cells in skeletal muscle. Circle chart shows percentage of CD45 and CD31 markers expression within the CD38<sup>+</sup> cells population. (D) Gating strategy employed to identify CD38, CD31 and CD45 expressing cells in skeletal muscle. (E-F) Representative fluorescent signal plots of CD38, CD45, CD31 and Sca-1 expressing cells in skeletal muscle (E) and heart (F) of WT mice. Circle chart shows percentage of CD45 and CD31 markers expression within the CD38<sup>+</sup> cells population. Column graph shows the percentage of Sca1<sup>+</sup> cells within the CD45<sup>-</sup>/CD31<sup>-</sup> cells population. (G) NAD<sup>+</sup>, NMN and NR levels in spleen of aged (2-year-old) mice treated with vehicle (Control) or 78c for 10 weeks. Metabolites were measured by high-performance liquid chromatography (HPLC)-mass spec (n=5-6 mice per group). (H) AML12 cells were incubated for 18 hours in media containing 100  $\mu$ M NMN in the presence or absence of 100 ng/ml rhCD38 and 1  $\mu$ M 78c. Protein lysates were immunoblotted with specific antibodies. (I) NAD<sup>+</sup>, NMN and NR levels in spleen of aged (2-year-old) mice treated with vehicle (Control), 78c, NR or 78c+NR. Mice received two doses of vehicle or 78c 22 hours and 6 hours prior to euthanasia. One dose of NR was given by gavage 6 hours before euthanasia. Metabolites were measured by high-performance liquid chromatography (HPLC)-mass spec (n=7-10 mice per group). All values are mean  $\pm$  SEM. \*  $P < 0.05$ .

**A**

CD38: - + + + +  
 78c: - - + + +  
 NAM: - - - + -  
 EX-527: - - - - +

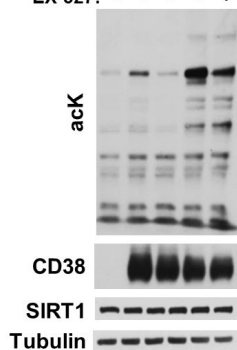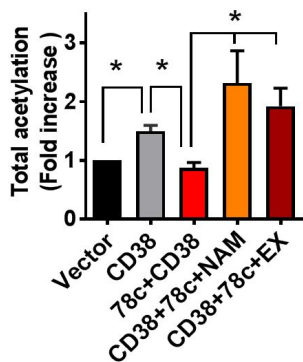

**B**

Flag.p65: - + + + + +  
 CD38: - - + + + +  
 78c: - - - + + +  
 NAM: - - - - + -  
 EX-527: - - - - - +

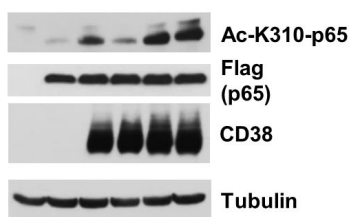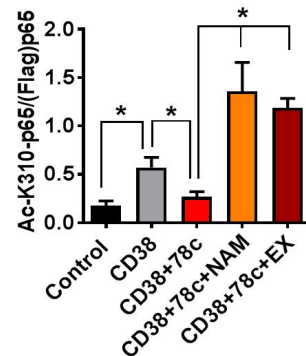

**C**

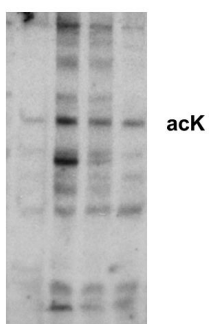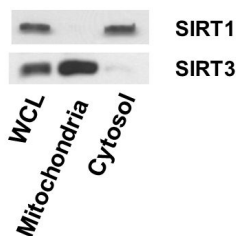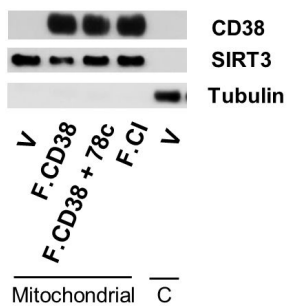

**D**

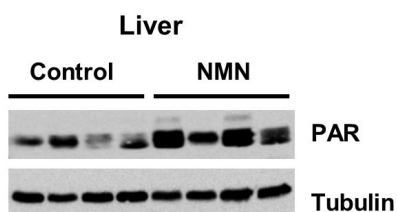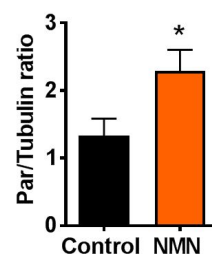

**E**

HA.p53: - + + + +  
 CD38: - - + + +  
 78c: - - - + -  
 Olaparib: - - - - +

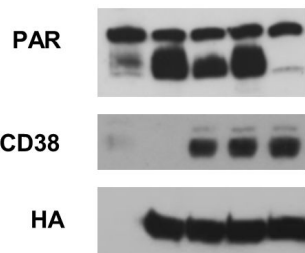

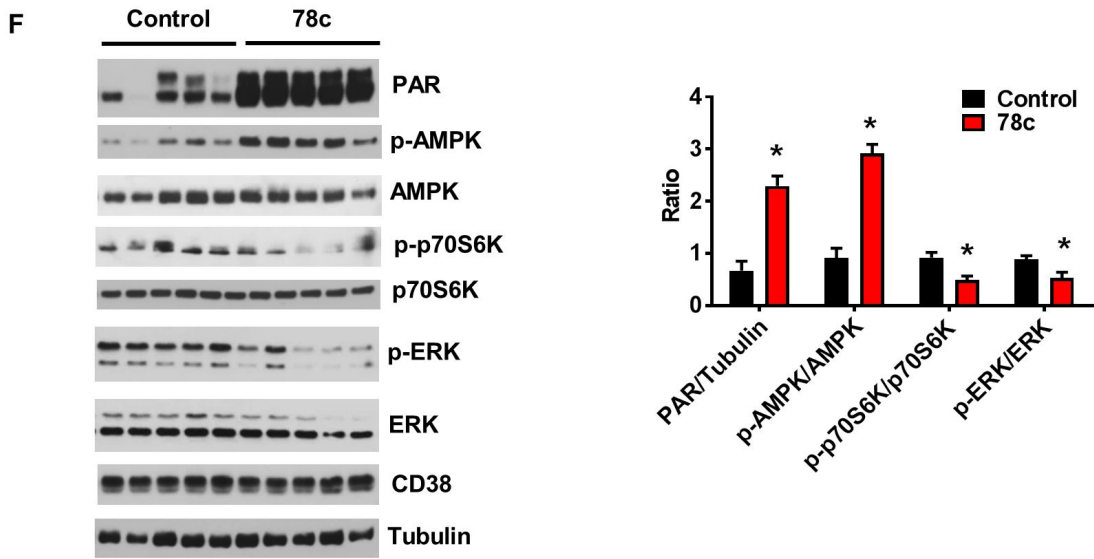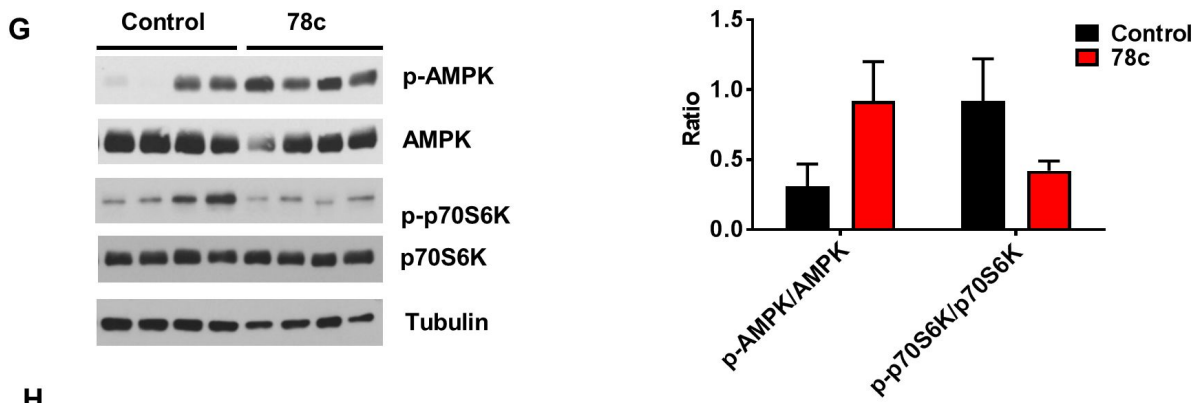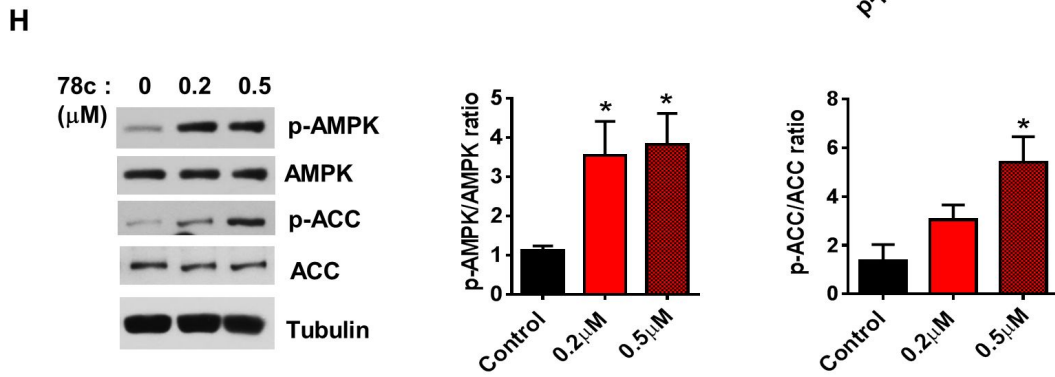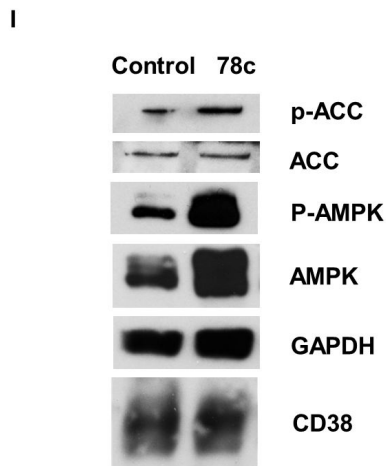

**Figure S5 (Related to Figure 5). 78c regulates signaling pathways involved in health span and longevity.**

**(A)** 293T cells were transfected with vector or CD38 plasmid. 24 hours after transfection, cells were treated with 0.5  $\mu$ M 78c in the presence or absence of 5  $\mu$ M SIRT1 inhibitor EX-527 (EX) or 5 mM nicotinamide (NAM). Cell lysates were immunoblotted for lysine acetylation (acK), CD38, SIRT1, and Tubulin. Graph shows quantification of immunoblots using vector transfection as a control (n=3-6 experiments). **(B)** 293T cells were transfected with vector, Flag-p65 and/or CD38 plasmids. After 24 hours of transfection, cells were treated with 0.5  $\mu$ M 78c in the presence or absence of 5  $\mu$ M EX-527 (EX) or 5 mM nicotinamide (NAM). Cell lysates were immunoblotted for p65 lysine acetylation (Ac-K310-p65), Flag (p65), CD38, and Tubulin. Graph shows quantification of immunoblots using p65 transfection alone as a control (n=3-6 experiments). **(C)** 293T cells were transfected with vector, CD38 WT, or CI plasmid, and then treated with 0.5  $\mu$ M 78c for 20 hours. Mitochondria were isolated, and mitochondria lysates or control cytosol (c) were immunoblotted with specific antibodies. Blot is representative of 3 experiments. Right blot shows presence of Sirt1 in cytosol and Sirt3 in mitochondrial fraction. **(D)** Mice were treated with a single dose of vehicle (Control) or NMN (500 mg/kg), and tissues collected 2 hours later. Liver lysates were immunoblotted for PAR and Tubulin. Graph shows quantification of immunoblots (n=4 mice per group). **(E)** 293T cells were transfected with vector or HA.p53 in the presence or absence of CD38 plasmid. 24 hours after transfection, cells were treated with 0.5  $\mu$ M 78c or 5  $\mu$ M olaparib (PARP inhibitor) for 24 hours. Cell lysates were immunoblotted for PAR, CD38, and HA (p53). Blot is representative of 3 experiments **(F-G)** 1-year-old mice were treated with 78c for 8 days. Spleen **(F)** and skeletal muscle **(G)** protein lysates were immunoblotted with specific antibodies. Graph shows quantification of immunoblots (n=4 mice per group). **(H)** A549 cells were treated with vehicle and different doses of 78c. Cell lysates were immunoblotted with specific antibodies. Graph shows quantification of immunoblots (n=3-4 experiments). **(I)** Mouse bone marrow-derived macrophages were treated with 100 ng/mL LPS (to induce CD38 expression) with and without 0.2  $\mu$ M 78c for 30 hours. Cell lysates were immunoblotted with the specific antibodies. Blot is representative of 3 experiments. All values are mean  $\pm$  SEM, \*  $P < 0.05$ .
